# Supplementary material
Source: PubMed Central journal article supplement (PMC5600853)
Supplement: NIHMS891419-supplement-2.pdf [file NIHMS891419-supplement-2.pdf]

**Supp Table 1: MDS Patient Disease Charecteristics**

| <b>Sample ID</b> | <b>Age</b> | <b>Sex</b> | <b>HGB</b> | <b>WBC</b> | <b>PLTs x 10<sup>3</sup></b> | <b>Disease Stage</b> |
|------------------|------------|------------|------------|------------|------------------------------|----------------------|
| MDS1             | 80         | M          | 10.2       | 730        | 27                           | RCMD                 |
| MDS5             | 70         | F          | 10.4       | 10390      | 37                           | CMML                 |
| MDS7             | 86         | M          | 10.2       | 2080       | 47                           | RAEB-2               |
| MDS11            | 91         | M          | 8.8        | 910        | 7                            | RAEB-1               |
| MDS14            | 71         | M          | 8.6        | 2810       | 36                           | RAEB-1               |
| MDS15            | 87         | M          | 6.3        | 2100       | 179                          | RA                   |
| MDS16            | 90         | F          | 8          | 4010       | 96                           | RAEB-2               |
| MDS18            | 34         | M          | 8.7        | 2400       | 7                            | Hypoplastic MDS      |
| MDS19            | 53         | M          | 11.4       | 2900       | 174                          | RAEB-1               |
| MDS20            | 66         | F          | 12.7       | 1470       | 151                          | RCUD                 |
| MDS21            | 41         | F          | 11.5       | 4000       | 150                          | RA                   |
| MDS22            | 69         | M          | 8.5        | 3050       | 40                           | RAEB-2               |
| MDS23            | 55         | M          | 10.2       | 3450       | 70                           | RCMD                 |

1 Supp Table 2: Pathways affected by hypermethylation in MDS stroma

| ID | Top Diseases and Functions                                                                       | Molecules in Network                                                                                                                              |
|----|--------------------------------------------------------------------------------------------------|---------------------------------------------------------------------------------------------------------------------------------------------------|
| 1  | Cellular Assembly and Organization, Cellular Function and Maintenance, Cancer                    | ABL1,ADAM19,AFAP1,AKT2,ARHGAP17,ARRDC1,COL14A1,HTT,ICAM1,IRF2BP1,JUNB,KEAP1,MAP1LC3A,MARK2,NF2,SEMA7A,SFRP1,SMARCB1,SYNPO2,TADA2B,TBC1D16,ZFYVE19 |
| 2  | Developmental Disorder, Hematological Disease, Hereditary Disorder                               | C16orf58,C19orf47,CECR5,CPNE2,PIEZO1,SH3RF3,SYDE1,THG1L,TMEM132A,TTC28,TTYH3,ZZEF1                                                                |
| 3  | DNA Replication, Recombination, and Repair, Energy Production, Nucleic Acid Metabolism           | ANKRD6,ATF5,CHD1L,CPSF1,CST6,DHX30,DHX34,DNA2,DOCK1,EPHB3,FXR2,GIPC1,ITGA7,PEX6,TIMM44,TUFM,WIZ                                                   |
| 4  | Cellular Assembly and Organization, Endocrine System Development and Function, Protein Synthesis | ACADS,CCDC8,ECE1,FBXO42,GBF1,PES1,PPIL2,RBM42,RGS16,RRS1,SGK223,SLC1A5,SNX18,TALDO1                                                               |
| 5  | Protein Degradation, Protein Synthesis, Organ Morphology                                         | AHCY,ANKS6,AP5B1,BEND5,C21orf33,COL5A3,ENKD1,LIMS2,LMCD1,PDLIM7,SCN8A,SEPT9,SH3BP5L                                                               |

2

3

**Supp Table 3: Genes that are methylated and underexpressed in MDS stroma**

| SEQ_ID            | NAME        | CHR   | TXSTART   | TXEND     | DESCRIPTION                                                                                                                                                                              |
|-------------------|-------------|-------|-----------|-----------|------------------------------------------------------------------------------------------------------------------------------------------------------------------------------------------|
| HSAP0406S00031389 | S82847      | chr19 | 10256604  | 10256844  | CDS; sICAM-1; sICAM-1; sICAM-1=ICAM-1 soluble variant {alternatively spliced, exon 6 to exon 7} [human, placenta, mRNA Partial, 135 nt].                                                 |
| HSAP0406S00016193 | AK090471    | chr8  | 145674247 | 145698311 | CDS; FLJ00392; FLJ00392 protein; Homo sapiens mRNA for FLJ00392 protein.                                                                                                                 |
| HSAP0406S00006895 | AF161443    | chr3  | 51671899  | 51672650  | CDS; N/A; HSPC325; Homo sapiens HSPC325 mRNA, partial cds.                                                                                                                               |
| HSAP0406S00025534 | BC023653    | chr15 | 38550817  | 38552647  | CDS; D4ST1; D4ST1 protein; Homo sapiens dermatan 4 sulfotransferase 1, mRNA (cDNA clone IMAGE:4549589), partial cds.                                                                     |
| HSAP0406S00025535 | AY358446    | chr15 | 38550807  | 38552647  | CDS; N/A; LMFA1925; Homo sapiens clone DNA87974 LMFA1925 (UNQ1925) mRNA, complete cds.                                                                                                   |
| HSAP0406S00025533 | AB066595    | chr15 | 38550488  | 38552647  | CDS; hD4ST1; dermatan 4-sulfotransferase; Homo sapiens hD4ST mRNA for dermatan 4-sulfotransferase, complete cds.                                                                         |
| HSAP0406S00033001 | NM_00100430 | chr19 | 58685787  | 58689358  | CDS; FLJ16542; FLJ16542 protein; Homo sapiens FLJ16542 protein (FLJ16542), mRNA.                                                                                                         |
| HSAP0406S00017806 | AK122590    | chr9  | 137630247 | 137658668 | CDS; FLJ00415; FLJ00415 protein; Homo sapiens mRNA for FLJ00415 protein.                                                                                                                 |
| HSAP0406S00019627 | NM_00100133 | chr11 | 7642908   | 7651397   | CDS; CYB5R2; cytochrome b5 reductase b5R.2 isoform 2; Homo sapiens cytochrome b5 reductase b5R.2 (CYB5R2), transcript variant 2, mRNA.                                                   |
| HSAP0406S00009206 | AF177291    | chr4  | 120310413 | 120311329 | CDS; N/A; genethonin 2; Homo sapiens genethonin 2 mRNA, partial cds.                                                                                                                     |
| HSAP0406S00027144 | AF258580    | chr16 | 24838219  | 24839826  | CDS; N/A; PP4534; Homo sapiens PP4534 mRNA, complete cds.                                                                                                                                |
| HSAP0406S00001914 | BC063894    | chr1  | 114776059 | 114925086 | CDS; FLJ37099; FLJ37099 protein; Homo sapiens FLJ37099 protein, mRNA (cDNA clone MGC:75543 IMAGE:30389241), complete cds.                                                                |
| HSAP0406S00011324 | NM_002955   | chr6  | 7084476   | 7196194   | CDS; RREB1; ras responsive element binding protein 1 isoform 2; Homo sapiens ras responsive element binding protein 1 (RREB1), transcript variant 2, mRNA.                               |
| HSAP0406S00017006 | BC064367    | chr9  | 98577257  | 98625939  | CDS; N/A; Unknown (protein for MGC:70366); Homo sapiens cDNA clone MGC:70366 IMAGE:5562895, complete cds.                                                                                |
| HSAP0406S00005987 | AB058771    | chr2  | 231952562 | 232064111 | CDS; KIAA1868; KIAA1868 protein; Homo sapiens mRNA for KIAA1868 protein, partial cds.                                                                                                    |
| HSAP0406S00009206 | AF177291    | chr4  | 120310413 | 120311329 | CDS; N/A; genethonin 2; Homo sapiens genethonin 2 mRNA, partial cds.                                                                                                                     |
| HSAP0406S00015390 | BC036503    | chr8  | 41238639  | 41286145  | CDS; SFRP1; SFRP1 protein; Homo sapiens secreted frizzled-related protein 1, mRNA (cDNA clone MGC:43294 IMAGE:5265277), complete cds.                                                    |
| HSAP0406S00005492 | NM_001463   | chr2  | 183524242 | 183557004 | CDS; FRZB; frizzled-related protein; Homo sapiens frizzled-related protein (FRZB), mRNA.                                                                                                 |
| HSAP0406S00032822 | AK123892    | chr19 | 55179719  | 55182773  | CDS; N/A; N/A; Homo sapiens cDNA FLJ41898 fis, clone OCBBF2037398.                                                                                                                       |
| HSAP0406S00027144 | AF258580    | chr16 | 24838219  | 24839826  | CDS; N/A; PP4534; Homo sapiens PP4534 mRNA, complete cds.                                                                                                                                |
| HSAP0406S00006176 | AK095300    | chr2  | 242101264 | 242104649 | CDS; N/A; N/A; Homo sapiens cDNA FLJ37981 fis, clone CTONG2010566.                                                                                                                       |
| HSAP0406S00003779 | BC011962    | chr1  | 245314397 | 245316222 | CDS; N/A; Similar to hypothetical protein, MGC:7813; Homo sapiens, Similar to hypothetical protein, MGC:7813, clone IMAGE:3863062, mRNA, partial cds.                                    |
| HSAP0406S00036409 | NM_000640   | chrX  | 114061519 | 114075187 | CDS; IL13RA2; interleukin 13 receptor, alpha 2 precursor; Homo sapiens interleukin 13 receptor, alpha 2 (IL13RA2), mRNA.                                                                 |
| HSAP0406S00026111 | NM_003612   | chr15 | 72489375  | 72513329  | CDS; SEMA7A; semaphorin 7A; Homo sapiens sema domain, immunoglobulin domain (Ig), and GPI membrane anchor, (semaphorin) 7A (SEMA7A), mRNA.                                               |
| HSAP0406S00007252 | NM_145037   | chr3  | 102980763 | 103025141 | CDS; MGC15606; hypothetical protein MGC15606; Homo sapiens hypothetical protein MGC15606 (MGC15606), mRNA.                                                                               |
| HSAP0406S00033714 | NM_032514   | chr20 | 32610179  | 32611810  | CDS; MAP1LC3A; microtubule-associated protein 1 light chain 3 alpha isoform a; Homo sapiens microtubule-associated protein 1 light chain 3 alpha (MAP1LC3A), transcript variant 1, mRNA. |

|                   |           |       |           |           |                                                                                                                                                                                                            |
|-------------------|-----------|-------|-----------|-----------|------------------------------------------------------------------------------------------------------------------------------------------------------------------------------------------------------------|
| HSAP0406S00018945 | NM_004193 | chr10 | 103995298 | 104132639 | CDS; GBF1; golgi-specific brefeldin A resistance factor 1; Homo sapiens golgi-specific brefeldin A resistance factor 1 (GBF1), mRNA.                                                                       |
| HSAP0406S00033292 | U09411    | chr19 | 63636407  | 63638763  | CDS; N/A; zinc finger protein ZNF132; Human zinc finger protein ZNF132 mRNA, complete cds.                                                                                                                 |
| HSAP0406S00036256 | NM_013347 | chrX  | 95945051  | 95946593  | CDS; RPA4; replication protein A4, 34kDa; Homo sapiens replication protein A4, 34kDa (RPA4), mRNA.                                                                                                         |
| HSAP0406S00031635 | NM_033025 | chr19 | 15079213  | 15086789  | CDS; 7h3; hypothetical protein FLJ13511; Homo sapiens hypothetical protein FLJ13511 (7h3), mRNA.                                                                                                           |
| HSAP0406S00016969 | AK027046  | chr9  | 97039090  | 97041314  | CDS; N/A; N/A; Homo sapiens cDNA: FLJ23393 fis, clone HEP17447.                                                                                                                                            |
| HSAP0406S00032820 | NM_012068 | chr19 | 55124271  | 55129003  | CDS; ATF5; activating transcription factor 5; Homo sapiens activating transcription factor 5 (ATF5), mRNA.                                                                                                 |
| HSAP0406S00008436 | NM_021638 | chr4  | 7878512   | 7992094   | CDS; AFAP; actin filament associated protein; Homo sapiens actin filament associated protein (AFAP), transcript variant 1, mRNA.                                                                           |
| HSAP0406S00016850 | AK129921  | chr9  | 88849096  | 88852712  | CDS; N/A; N/A; Homo sapiens cDNA FLJ26411 fis, clone HRT09683.                                                                                                                                             |
| HSAP0406S00004875 | AL831825  | chr2  | 109616445 | 109619576 | CDS; DKFZp547G0613; hypothetical protein; Homo sapiens mRNA; cDNA DKFZp547G0613 (from clone DKFZp547G0613).                                                                                                |
| HSAP0406S00014395 | AK123726  | chr7  | 106437153 | 106439352 | CDS; N/A; N/A; Homo sapiens cDNA FLJ41732 fis, clone HLUNG2017546.                                                                                                                                         |
| HSAP0406S00011804 | BC019083  | chr6  | 32045571  | 32048200  | CDS; DOM3Z; DOM-3 homolog Z; Homo sapiens dom-3 homolog Z (C. elegans), mRNA (cDNA clone MGC:29502 IMAGE:4647012), complete cds.                                                                           |
| HSAP0406S00022500 | AY358160  | chr12 | 54918271  | 54919033  | CDS; N/A; CVWG5837; Homo sapiens clone DNA131636 CVWG5837 (UNQ5837) mRNA, complete cds.                                                                                                                    |
| HSAP0406S00002084 | NM_004284 | chr1  | 143939149 | 143992257 | CDS; CHD1L; chromodomain helicase DNA binding protein 1-like; Homo sapiens chromodomain helicase DNA binding protein 1-like (CHD1L), mRNA.                                                                 |
| HSAP0406S00028846 | NM_004740 | chr17 | 24424664  | 24426753  | CDS; TIAF1; TGFB1-induced anti-apoptotic factor 1; Homo sapiens TGFB1-induced anti-apoptotic factor 1 (TIAF1), mRNA.                                                                                       |
| HSAP0406S00004114 | NM_032574 | chr2  | 32160672  | 32176474  | CDS; LOC84661; dpy-30-like protein; Homo sapiens dpy-30-like protein (LOC84661), mRNA.                                                                                                                     |
| HSAP0406S00025084 | AF117819  | chr14 | 95800777  | 95800848  | CDS; N/A; bradykinin B1 receptor; Homo sapiens bradykinin B1 receptor mRNA, partial cds and 3'-untranslated region.                                                                                        |
| HSAP0406S00035863 | NM_007137 | chrX  | 47452554  | 47537860  | CDS; ZNF81; zinc finger protein 81 (HFZ20); Homo sapiens zinc finger protein 81 (HFZ20) (ZNF81), mRNA.                                                                                                     |
| HSAP0406S00010932 | NM_033274 | chr5  | 156836890 | 156935346 | CDS; ADAM19; a disintegrin and metalloproteinase domain 19 isoform 2 preproprotein; Homo sapiens a disintegrin and metalloproteinase domain 19 (meltrin beta) (ADAM19), transcript variant 2, mRNA.        |
| HSAP0406S00027201 | NM_003321 | chr16 | 28761613  | 28765144  | CDS; TUFM; Tu translation elongation factor, mitochondrial; Homo sapiens Tu translation elongation factor, mitochondrial (TUFM), mRNA.                                                                     |
| HSAP0406S00032263 | BC015174  | chr19 | 44607188  | 44607994  | CDS; N/A; Unknown (protein for IMAGE:3903143); Homo sapiens, clone IMAGE:3903143, mRNA, partial cds.                                                                                                       |
| HSAP0406S00016570 | D87447    | chr9  | 35739339  | 35747922  | CDS; KIAA0258; N/A; Homo sapiens mRNA for KIAA0258 gene, partial cds.                                                                                                                                      |
| HSAP0406S00006076 | NM_001485 | chr2  | 236856306 | 236858652 | CDS; GBX2; gastrulation brain homeo box 2; Homo sapiens gastrulation brain homeo box 2 (GBX2), mRNA.                                                                                                       |
| HSAP0406S00016852 | NM_016848 | chr9  | 88857624  | 89023236  | CDS; SHC3; src homology 2 domain containing transforming protein C3; Homo sapiens src homology 2 domain containing transforming protein C3 (SHC3), mRNA.                                                   |
| HSAP0406S00018432 | NM_173555 | chr10 | 71568973  | 71576442  | CDS; TYSND1; trypsin domain containing 1; Homo sapiens trypsin domain containing 1 (TYSND1), mRNA.                                                                                                         |
| HSAP0406S00032807 | AL050131  | chr19 | 55051572  | 55053452  | CDS; N/A; N/A; Homo sapiens mRNA; cDNA DKFZp586I111 (from clone DKFZp586I111).                                                                                                                             |
| HSAP0406S00023231 | BC025963  | chr12 | 119626361 | 119640530 | CDS; ACADS; acyl-Coenzyme A dehydrogenase, C-2 to C-3 short chain, precursor; Homo sapiens acyl-Coenzyme A dehydrogenase, C-2 to C-3 short chain, mRNA (cDNA clone MGC:39242 IMAGE:4842286), complete cds. |
| HSAP0406S00000472 | NM_018125 | chr1  | 17611635  | 17769669  | CDS; FLJ10521; hypothetical protein FLJ10521; Homo sapiens hypothetical protein FLJ10521 (FLJ10521), mRNA.                                                                                                 |

|                   |           |       |           |           |                                                                                                                                                                                  |
|-------------------|-----------|-------|-----------|-----------|----------------------------------------------------------------------------------------------------------------------------------------------------------------------------------|
| HSAP0406S00000426 | AL833874  | chr1  | 16322459  | 16323572  | CDS; DKFZp762L155; hypothetical protein; Homo sapiens mRNA; cDNA DKFZp762L155 (from clone DKFZp762L155).                                                                         |
| HSAP0406S00009957 | NM_052870 | chr5  | 53849539  | 53851426  | CDS; SNAG1; sorting nexin associated golgi protein 1; Homo sapiens sorting nexin associated golgi protein 1 (SNAG1), mRNA.                                                       |
| HSAP0406S00015996 | AF426412  | chr8  | 141604900 | 141605442 | CDS; HB92; cervical cancer homeoprotein 92; Homo sapiens cervical cancer homeoprotein 92 (HB92) mRNA, partial cds.                                                               |
| HSAP0406S00026147 | AK124968  | chr15 | 73415456  | 73419660  | CDS; N/A; N/A; Homo sapiens cDNA FLJ42978 fis, clone BRTHA2004821.                                                                                                               |
| HSAP0406S00005232 | NM_152528 | chr2  | 159917818 | 159968570 | CDS; WDSAM1; WD repeat and SAM domain containing 1; Homo sapiens WD repeat and SAM domain containing 1 (WDSAM1), mRNA.                                                           |
| HSAP0406S00015351 | NM_000349 | chr8  | 38120326  | 38127619  | CDS; STAR; steroidogenic acute regulator; Homo sapiens steroidogenic acute regulator (STAR), mRNA.                                                                               |
| HSAP0406S00016570 | D87447    | chr9  | 35739339  | 35747922  | CDS; KIAA0258; N/A; Homo sapiens mRNA for KIAA0258 gene, partial cds.                                                                                                            |
| HSAP0406S00029788 | BC053534  | chr17 | 59875900  | 59895221  | CDS; LOC284021; LOC284021 protein; Homo sapiens hypothetical protein LOC284021, mRNA (cDNA clone IMAGE:4428684), partial cds.                                                    |
| HSAP0406S00015024 | AK122582  | chr8  | 8212675   | 8276599   | CDS; FLJ00269; FLJ00269 protein; Homo sapiens mRNA for FLJ00269 protein.                                                                                                         |
| HSAP0406S00026691 | NM_020764 | chr16 | 2167184   | 2186524   | CDS; CASKIN1; CASK interacting protein 1; Homo sapiens CASK interacting protein 1 (CASKIN1), mRNA.                                                                               |
| HSAP0406S00034461 | NM_152505 | chr21 | 39699639  | 39737998  | CDS; C21orf13; chromosome 21 open reading frame 13; Homo sapiens chromosome 21 open reading frame 13 (C21orf13), mRNA.                                                           |
| HSAP0406S00032623 | NM_005628 | chr19 | 51969981  | 51983653  | CDS; SLC1A5; solute carrier family 1 (neutral amino acid transporter), member 5; Homo sapiens solute carrier family 1 (neutral amino acid transporter), member 5 (SLC1A5), mRNA. |
| HSAP0406S00019487 | AK130030  | chr11 | 3794557   | 3799706   | CDS; N/A; N/A; Homo sapiens cDNA FLJ26520 fis, clone KDN08032.                                                                                                                   |
| HSAP0406S00018432 | NM_173555 | chr10 | 71568973  | 71576442  | CDS; TYSND1; trypsin domain containing 1; Homo sapiens trypsin domain containing 1 (TYSND1), mRNA.                                                                               |
| HSAP0406S00011362 | BC016820  | chr6  | 10779641  | 10802824  | CDS; C6orf52; C6orf52 protein; Homo sapiens chromosome 6 open reading frame 52, mRNA (cDNA clone IMAGE:4096427), partial cds.                                                    |
| HSAP0406S00018129 | NM_003873 | chr10 | 33506432  | 33663476  | CDS; NRP1; neuropilin 1; Homo sapiens neuropilin 1 (NRP1), mRNA.                                                                                                                 |
| HSAP0406S00028293 | NM_015113 | chr17 | 3854488   | 3993063   | CDS; ZZEF1; zinc finger, ZZ-type with EF hand domain 1; Homo sapiens zinc finger, ZZ-type with EF hand domain 1 (ZZEF1), mRNA.                                                   |
| HSAP0406S00008426 | BC047794  | chr4  | 7163226   | 7174431   | CDS; MGC21874; MGC21874 protein; Homo sapiens transcriptional adaptor 2 (ADA2 homolog, yeast)-beta, mRNA (cDNA clone IMAGE:6190777), partial cds.                                |
| HSAP0406S00032604 | NM_032040 | chr19 | 51605928  | 51608681  | CDS; CCDC8; coiled-coil domain containing 8; Homo sapiens coiled-coil domain containing 8 (CCDC8), mRNA.                                                                         |
| HSAP0406S00025554 | BC015738  | chr15 | 38886604  | 38894059  | CDS; ZFYVE19; ZFYVE19 protein; Homo sapiens zinc finger, FYVE domain containing 19, mRNA (cDNA clone MGC:23002 IMAGE:4876596), complete cds.                                     |
| HSAP0406S00032298 | NM_178830 | chr19 | 45518812  | 45546133  | CDS; FLJ36888; hypothetical protein FLJ36888 (FLJ36888), mRNA.                                                                                                                   |
| HSAP0406S00031519 | U68382    | chr19 | 12618374  | 12638497  | CDS; MANB; truncated lysosomal acid alpha-mannosidase; Human lysosomal acid alpha-mannosidase (MANB) mRNA, alternatively spliced transcript, complete cds.                       |
| HSAP0406S00032568 | NM_175875 | chr19 | 50959883  | 50964152  | CDS; SIX5; sine oculis homeobox homolog 5; Homo sapiens sine oculis homeobox homolog 5 (Drosophila) (SIX5), mRNA.                                                                |
| HSAP0406S00015766 | AK074518  | chr8  | 100025845 | 100033508 | CDS; N/A; N/A; Homo sapiens cDNA FLJ90037 fis, clone HEMBA1002048, moderately similar to ODD-SKIPPED PROTEIN.                                                                    |
| HSAP0406S00011126 | BC067806  | chr5  | 176843004 | 176857208 | CDS; PDLIM7; PDLIM7 protein; Homo sapiens PDZ and LIM domain 7 (enigma), mRNA (cDNA clone IMAGE:5287820), complete cds.                                                          |

|                   |           |       |           |           |                                                                                                                                                                                                                                                               |
|-------------------|-----------|-------|-----------|-----------|---------------------------------------------------------------------------------------------------------------------------------------------------------------------------------------------------------------------------------------------------------------|
| HSAP0406S00012137 | BC048331  | chr6  | 43039724  | 43054882  | CDS; PEX6; peroxisomal biogenesis factor 6; Homo sapiens peroxisomal biogenesis factor 6, mRNA (cDNA clone MGC:54056 IMAGE:5189685), complete cds. CDS; FLJ22301; hypothetical protein FLJ22301; Homo sapiens hypothetical protein FLJ22301 (FLJ22301), mRNA. |
| HSAP0406S00003783 | NM_024836 | chr1  | 245342280 | 245353464 | CDS; FLJ00041; FLJ00041 protein; Homo sapiens mRNA for FLJ00041 protein, partial cds.                                                                                                                                                                         |
| HSAP0406S00018472 | AK024449  | chr10 | 73177321  | 73203261  | CDS; STK10; serine/threonine kinase 10; Homo sapiens serine/threonine kinase 10 (STK10), mRNA.                                                                                                                                                                |
| HSAP0406S00011021 | NM_005990 | chr5  | 171403229 | 171547865 | CDS; SURF2; surfet 2; Homo sapiens surfet 2 (SURF2), mRNA.                                                                                                                                                                                                    |
| HSAP0406S00017602 | NM_017503 | chr9  | 133252981 | 133257586 | CDS; FKBP1B; FK506-binding protein 1B isoform b; Homo sapiens FK506 binding protein 1B, 12.6 kDa (FKBP1B), transcript variant 2, mRNA.                                                                                                                        |
| HSAP0406S00003947 | NM_054033 | chr2  | 24184278  | 24198199  | CDS; N/A; G protein-coupled receptor; Human G protein-coupled receptor mRNA, complete cds.                                                                                                                                                                    |
| HSAP0406S00024962 | U35398    | chr14 | 90769964  | 90771247  | CDS; N/A; AHNAK-related protein; H.sapiens mRNA of AHNAK-related sequence.                                                                                                                                                                                    |
| HSAP0406S00020300 | X74818    | chr11 | 62044527  | 62046128  | CDS; N/A; N/A; Homo sapiens cDNA FLJ46846 fis, clone UTERU3004635, moderately similar to Neuroblast differentiation associated protein AHNAK.                                                                                                                 |
| HSAP0406S00020301 | AK128868  | chr11 | 62041343  | 62046487  | CDS; FLJ20241; putative NFkB activating protein; Homo sapiens putative NFkB activating protein (FLJ20241), mRNA.                                                                                                                                              |
| HSAP0406S00031579 | NM_017721 | chr19 | 13864992  | 13902691  | CDS; SIAT7D; sialyltransferase 7D isoform a; Homo sapiens sialyltransferase 7D ((alpha-N-acetylneuraminyl-2,3-beta-galactosyl-1,3)-N-acetyl galactosaminide alpha-2,6-sialyltransferase) (SIAT7D), transcript variant 1, mRNA.                                |
| HSAP0406S00017399 | NM_014403 | chr9  | 127749719 | 127758855 | CDS; FLJ11588; FLJ11588 protein; Homo sapiens hypothetical protein FLJ11588, mRNA (cDNA clone MGC:14179 IMAGE:4121760), complete cds.                                                                                                                         |
| HSAP0406S00001240 | BC007932  | chr1  | 48905563  | 48954610  | CDS; N/A; N/A; Homo sapiens cDNA FLJ41485 fis, clone BRTHA2003116.                                                                                                                                                                                            |
| HSAP0406S00035340 | AK123479  | chr22 | 40659248  | 40667655  | CDS; DKFZP434P0316; hypothetical protein DKFZp434P0316; Homo sapiens hypothetical protein DKFZp434P0316 (DKFZP434P0316), mRNA.                                                                                                                                |
| HSAP0406S00030027 | NM_032134 | chr17 | 71781726  | 71815356  | CDS; SLC1A5; SLC1A5 protein; Homo sapiens solute carrier family 1 (neutral amino acid transporter), member 5, mRNA (cDNA clone IMAGE:3446313), complete cds.                                                                                                  |
| HSAP0406S00032622 | BC000986  | chr19 | 51982911  | 51984136  | CDS; C21orf33; homolog of zebrafish ES1 isoform 1a precursor; Homo sapiens chromosome 21 open reading frame 33 (C21orf33), nuclear gene encoding mitochondrial protein, transcript variant 1, mRNA.                                                           |
| HSAP0406S00034560 | NM_004649 | chr21 | 44377923  | 44390020  | CDS; KIAA1868; KIAA1868 protein; Homo sapiens mRNA for KIAA1868 protein, partial cds.                                                                                                                                                                         |
| HSAP0406S00005987 | AB058771  | chr2  | 231952562 | 232064111 | CDS; ATM; ataxia telangiectasia mutated protein isoform 1; Homo sapiens ataxia telangiectasia mutated (includes complementation groups A, C and D) (ATM), transcript variant 1, mRNA.                                                                         |
| HSAP0406S00021097 | NM_000051 | chr11 | 107599052 | 107741966 | CDS; KIAA1866; KIAA1866 protein; Homo sapiens mRNA for KIAA1866 protein, partial cds.                                                                                                                                                                         |
| HSAP0406S00013064 | AB058769  | chr6  | 159621409 | 159663550 | CDS; N/A; N/A; Homo sapiens cDNA FLJ13963 fis, clone Y79AA1001299, highly similar to Homo sapiens mRNA for integrase interactor 1b protein (INI1B).                                                                                                           |
| HSAP0406S00034908 | AK024025  | chr22 | 22453703  | 22501246  | CDS; TIMM44; translocase of inner mitochondrial membrane 44 homolog; Homo sapiens translocase of inner mitochondrial membrane 44 homolog (yeast) (TIMM44), mRNA.                                                                                              |
| HSAP0406S00031304 | NM_006351 | chr19 | 7897603   | 7914538   | CDS; JUNB; jun B proto-oncogene; Homo sapiens jun B proto-oncogene (JUNB), mRNA.                                                                                                                                                                              |
| HSAP0406S00031535 | NM_002229 | chr19 | 12763309  | 12765124  | CDS; THBS3; thrombospondin 3 precursor; Homo sapiens thrombospondin 3 (THBS3), mRNA.                                                                                                                                                                          |
| HSAP0406S00002429 | NM_007112 | chr1  | 151978453 | 151990763 | CDS; PDLIM7; PDLIM7 protein; Homo sapiens PDZ and LIM domain 7 (enigma), mRNA (cDNA clone IMAGE:5287820), complete cds.                                                                                                                                       |
| HSAP0406S00011126 | BC067806  | chr5  | 176843004 | 176857208 | CDS; PES1; pescadillo homolog 1, containing BRCT domain; Homo sapiens pescadillo homolog 1, containing BRCT domain (zebrafish) (PES1), mRNA.                                                                                                                  |
| HSAP0406S00035052 | NM_014303 | chr22 | 29297166  | 29312448  |                                                                                                                                                                                                                                                               |

|                   |           |       |           |           |                                                                                                                                                              |
|-------------------|-----------|-------|-----------|-----------|--------------------------------------------------------------------------------------------------------------------------------------------------------------|
| HSAP0406S00009252 | NM_152618 | chr4  | 124011461 | 124023702 | CDS; FLJ35630; hypothetical protein FLJ35630; Homo sapiens hypothetical protein FLJ35630 (FLJ35630), mRNA.                                                   |
| HSAP0406S00002971 | NM_002928 | chr1  | 179299415 | 179305200 | CDS; RGS16; regulator of G-protein signalling 16; Homo sapiens regulator of G-protein signalling 16 (RGS16), mRNA.                                           |
| HSAP0406S00028077 | NM_014745 | chr16 | 87309255  | 87330160  | CDS; FAM38A; family with sequence similarity 38, member A; Homo sapiens family with sequence similarity 38, member A (FAM38A), mRNA.                         |
| HSAP0406S00003692 | D13413    | chr1  | 241353053 | 241353628 | CDS; N/A; p120; Homo sapiens mRNA for p120, partial cds.                                                                                                     |
| HSAP0406S00003696 | AK027158  | chr1  | 241614044 | 241616504 | CDS; N/A; N/A; Homo sapiens cDNA: FLJ23505 fis, clone LNG03017.                                                                                              |
| HSAP0406S00031386 | NM_000201 | chr19 | 10242778  | 10258291  | CDS; ICAM1; intercellular adhesion molecule 1 precursor; Homo sapiens intercellular adhesion molecule 1 (CD54), human rhinovirus receptor (ICAM1), mRNA.     |
| HSAP0406S00000438 | AB067509  | chr1  | 16539236  | 16564502  | CDS; KIAA1922; KIAA1922 protein; Homo sapiens mRNA for KIAA1922 protein, partial cds.                                                                        |
| HSAP0406S00027687 | NM_032140 | chr16 | 66254350  | 66258129  | CDS; DKFZP434A1319; hypothetical protein DKFZp434A1319 (DKFZP434A1319), mRNA.                                                                                |
| HSAP0406S00000566 | AK127275  | chr1  | 21884063  | 21897020  | CDS; N/A; N/A; Homo sapiens cDNA FLJ45342 fis, clone BRHIP3009753.                                                                                           |
| HSAP0406S00027545 | BC053658  | chr16 | 55684023  | 55739375  | CDS; CPNE2; CPNE2 protein; Homo sapiens copine II, mRNA (cDNA clone MGC:61692 IMAGE:5750192), complete cds.                                                  |
| HSAP0406S00002019 | AF380582  | chr1  | 142802373 | 142804880 | CDS; N/A; AG8; Homo sapiens AG8 mRNA, partial cds.                                                                                                           |
| HSAP0406S00017814 | NM_152285 | chr9  | 137775942 | 137785646 | CDS; ARRDC1; arrestin domain containing 1; Homo sapiens arrestin domain containing 1 (ARRDC1), mRNA.                                                         |
| HSAP0406S00018851 | BC015951  | chr10 | 101360271 | 101360390 | CDS; SLC25A28; SLC25A28 protein; Homo sapiens solute carrier family 25, member 28, mRNA (cDNA clone IMAGE:3909610), partial cds.                             |
| HSAP0406S00017652 | BC004905  | chr9  | 135621458 | 135622461 | CDS; MRPS2; MRPS2 protein; Homo sapiens mitochondrial ribosomal protein S2, mRNA (cDNA clone IMAGE:3509565), complete cds.                                   |
| HSAP0406S00032622 | BC000986  | chr19 | 51982911  | 51984136  | CDS; SLC1A5; SLC1A5 protein; Homo sapiens solute carrier family 1 (neutral amino acid transporter), member 5, mRNA (cDNA clone IMAGE:3446313), complete cds. |
| HSAP0406S00014124 | NM_005221 | chr7  | 96294358  | 96298794  | CDS; DLX5; distal-less homeo box 5; Homo sapiens distal-less homeo box 5 (DLX5), mRNA.                                                                       |
| HSAP0406S00025698 | NM_025137 | chr15 | 42642191  | 42743138  | CDS; FLJ21439; hypothetical protein FLJ21439; Homo sapiens hypothetical protein FLJ21439 (FLJ21439), mRNA.                                                   |
| HSAP0406S00015877 | BC014640  | chr8  | 121332166 | 121453452 | CDS; COL14A1; COL14A1 protein; Homo sapiens collagen, type XIV, alpha 1 (undulin), mRNA (cDNA clone MGC:15451 IMAGE:2960796), complete cds.                  |
| HSAP0406S00016175 | NM_013291 | chr8  | 145589257 | 145605517 | CDS; CPSF1; cleavage and polyadenylation specific factor 1, 160kDa; Homo sapiens cleavage and polyadenylation specific factor 1, 160kDa (CPSF1), mRNA.       |
| HSAP0406S00010277 | NM_005654 | chr5  | 92944798  | 92955540  | CDS; NR2F1; nuclear receptor subfamily 2, group F, member 1; Homo sapiens nuclear receptor subfamily 2, group F, member 1 (NR2F1), mRNA.                     |
| HSAP0406S00013257 | NM_025250 | chr7  | 2444843   | 2477675   | CDS; TTYH3; tweety 3; Homo sapiens tweety homolog 3 (Drosophila) (TTYH3), mRNA.                                                                              |
| HSAP0406S00027098 | AY359095  | chr16 | 22732998  | 22835572  | CDS; N/A; HS3ST2; Homo sapiens clone DNA97013 HS3ST2 (UNQ2442) mRNA, complete cds.                                                                           |
| HSAP0406S00006717 | NM_014966 | chr3  | 47819654  | 47866686  | CDS; DHX30; DEAH (Asp-Glu-Ala-His) box polypeptide 30 isoform 2; Homo sapiens DEAH (Asp-Glu-Ala-His) box polypeptide 30 (DHX30), transcript variant 2, mRNA. |
| HSAP0406S00016136 | NM_030974 | chr8  | 145225528 | 145231081 | CDS; Sharpin; shank-interacting protein-like 1 alpha; Homo sapiens shank-interacting protein-like 1 alpha (Sharpin), mRNA.                                   |
| HSAP0406S00020006 | NM_002391 | chr11 | 46359859  | 46361950  | CDS; MDK; midkine (neurite growth-promoting factor 2); Homo sapiens midkine (neurite growth-promoting factor 2) (MDK), mRNA.                                 |
| HSAP0406S00000547 | AB031742  | chr1  | 21291380  | 21361955  | CDS; N/A; endothelin-converting enzyme-1c; Homo sapiens mRNA for endothelin-converting enzyme-1c, complete cds.                                              |

|                   |           |       |           |           |                                                                                                                                                                                                       |
|-------------------|-----------|-------|-----------|-----------|-------------------------------------------------------------------------------------------------------------------------------------------------------------------------------------------------------|
| HSAP0406S00028461 | NM_004860 | chr17 | 7435271   | 7458796   | CDS; FXR2; fragile X mental retardation syndrome related protein 2; Homo sapiens fragile X mental retardation, autosomal homolog 2 (FXR2), mRNA. CDS; N/A; N/A; Homo sapiens cDNA FLJ45598 fis, clone |
| HSAP0406S00026714 | AK127505  | chr16 | 2506762   | 2508001   | BRTHA3018623. CDS; FLJ42117; FLJ42117 protein; Homo sapiens                                                                                                                                           |
| HSAP0406S00007063 | NM_198463 | chr3  | 58702776  | 59010755  | FLJ42117 protein (FLJ42117), mRNA. CDS; DOCK1; dedicator of cytokinesis 1; Homo sapiens                                                                                                               |
| HSAP0406S00019211 | NM_001380 | chr10 | 128658954 | 129140769 | dedicator of cytokinesis 1 (DOCK1), mRNA. CDS; N/A; Unknown (protein for IMAGE:4431121); Homo                                                                                                         |
| HSAP0406S00017965 | BC026226  | chr10 | 14924723  | 14929003  | sapiens cDNA clone IMAGE:4431121, partial cds. CDS; SCARF2; scavenger receptor class F, member 2                                                                                                      |
| HSAP0406S00034788 | NM_153334 | chr22 | 19103428  | 19116700  | isoform 1; Homo sapiens scavenger receptor class F, member 2 (SCARF2), transcript variant 1, mRNA. CDS; DKFZp434C184; DKFZp434C184 protein; Homo                                                      |
| HSAP0406S00000787 | BC064375  | chr1  | 29266555  | 29271023  | sapiens cDNA DKFZp434C184 gene, mRNA (cDNA clone IMAGE:5722634), partial cds. CDS; N/A; N/A; Homo sapiens cDNA FLJ13515 fis, clone                                                                    |
| HSAP0406S00020235 | AK023577  | chr11 | 60455808  | 60461206  | PLACE1005595. CDS; N/A; N/A; Homo sapiens cDNA FLJ20748 fis, clone                                                                                                                                    |
| HSAP0406S00030138 | AK000755  | chr17 | 75524024  | 75526454  | HEP05772. CDS; KKS1; homolog of yeast ribosome biogenesis                                                                                                                                             |
| HSAP0406S00015540 | NM_015169 | chr8  | 67503816  | 67505520  | regulatory protein RRS1; Homo sapiens RRS1 ribosome biogenesis regulator homolog (S. cerevisiae) (RRS1), mRNA. CDS; C6orf47; G4 protein; Homo sapiens chromosome 6                                    |
| HSAP0406S00011765 | NM_021184 | chr6  | 31734053  | 31736489  | open reading frame 47 (C6orf47), mRNA. CDS; FLJ39575; hypothetical protein FLJ39575; Homo                                                                                                             |
| HSAP0406S00014434 | NM_182597 | chr7  | 111714996 | 111724893 | sapiens hypothetical protein FLJ39575 (FLJ39575), mRNA. CDS; KIAA1298; KIAA1298 protein; Homo sapiens                                                                                                 |
| HSAP0406S00023012 | AB037719  | chr12 | 107681038 | 107701420 | mRNA for KIAA1298 protein, partial cds. CDS; HSPD1; chaperonin; Homo sapiens heat shock                                                                                                               |
| HSAP0406S00005592 | NM_002156 | chr2  | 198176815 | 198190146 | 60kDa protein 1 (chaperonin) (HSPD1), nuclear gene encoding mitochondrial protein, transcript variant 1, mRNA. CDS; RASD1; RAS, dexamethasone-induced 1; Homo                                         |
| HSAP0406S00028647 | NM_016084 | chr17 | 17338479  | 17340432  | sapiens RAS, dexamethasone-induced 1 (RASD1), mRNA. CDS; MARK2; MAP/microtubule affinity-regulating kinase                                                                                            |
| HSAP0406S00020375 | NM_017490 | chr11 | 63412650  | 63433628  | 2 isoform a; Homo sapiens MAP/microtubule affinity-regulating kinase 2 (MARK2), transcript variant 1, mRNA. CDS; SPOCD1; SPOCD1 protein; Homo sapiens SPOC                                            |
| HSAP0406S00000825 | BC039870  | chr1  | 31925117  | 31925814  | domain containing 1, mRNA (cDNA clone IMAGE:4184930), partial cds. CDS; C21orf13; chromosome 21 open reading frame 13; Homo sapiens chromosome 21 open reading frame 13                               |
| HSAP0406S00034461 | NM_152505 | chr21 | 39699639  | 39737998  | (C21orf13), mRNA. CDS; TALDO1; transaldolase 1; Homo sapiens                                                                                                                                          |
| HSAP0406S00019358 | NM_006755 | chr11 | 737431    | 755023    | transaldolase 1 (TALDO1), mRNA. CDS; ISYNA1; myo-inositol 1-phosphate synthase A1; Homo sapiens myo-inositol 1-phosphate synthase A1, mRNA (cDNA clone MGC:87044 IMAGE:5262041),                      |
| HSAP0406S00031794 | BC066902  | chr19 | 18406618  | 18409941  | complete cds. CDS; N/A; p120; Homo sapiens mRNA for p120, partial                                                                                                                                     |
| HSAP0406S00003692 | D13413    | chr1  | 241353053 | 241353628 | cds. CDS; N/A; N/A; Homo sapiens cDNA FLJ40532 fis, clone                                                                                                                                             |
| HSAP0406S00028076 | AK097851  | chr16 | 87312523  | 87314368  | TESTI2047801. CDS; PP1030; unknown; Homo sapiens PP1030 mRNA, complete cds. CDS; KEAP1; kelch-like ECH-associated protein 1; Homo                                                                     |
| HSAP0406S00020514 | AF193040  | chr11 | 65301669  | 65303892  | sapiens kelch-like ECH-associated protein 1 (KEAP1), transcript variant 1, mRNA. CDS; ABCC3; ATP-binding cassette, sub-family C, member 3 isoform MRP3B; Homo sapiens ATP-binding                     |
| HSAP0406S00031407 | NM_203500 | chr19 | 10457795  | 10475054  | cassette, sub-family C (CFTR/MRP), member 3 (ABCC3), transcript variant MRP3B, mRNA. CDS; MGC10433; hypothetical protein MGC10433; Homo                                                               |
| HSAP0406S00029580 | NM_020038 | chr17 | 46067226  | 46124061  | sapiens hypothetical protein MGC10433 (MGC10433), mRNA. CDS; MGC10433; hypothetical protein MGC10433; Homo                                                                                            |
| HSAP0406S00032070 | NM_024321 | chr19 | 40811819  | 40820426  | sapiens hypothetical protein MGC10433 (MGC10433), mRNA.                                                                                                                                               |



|                   |           |       |           |           |                                                                                                                                                                                                      |
|-------------------|-----------|-------|-----------|-----------|------------------------------------------------------------------------------------------------------------------------------------------------------------------------------------------------------|
| HSAP0406S00025269 | NM_004689 | chr14 | 104957410 | 105008100 | CDS; MTA1; metastasis associated protein; Homo sapiens metastasis associated 1 (MTA1), mRNA.                                                                                                         |
| HSAP0406S00008086 | NM_004443 | chr3  | 185762288 | 185782897 | CDS; EPHB3; ephrin receptor EphB3 precursor; Homo sapiens EphB3 (EPHB3), mRNA.                                                                                                                       |
| HSAP0406S00022388 | NM_006897 | chr12 | 52680143  | 52683385  | CDS; HOXC9; homeo box C9; Homo sapiens homeo box C9 (HOXC9), mRNA.                                                                                                                                   |
| HSAP0406S00006998 | NM_172234 | chr3  | 53855611  | 53874866  | CDS; IL17RB; interleukin 17B receptor isoform 2 precursor; Homo sapiens interleukin 17 receptor B (IL17RB), transcript variant 2, mRNA.                                                              |
| HSAP0406S00017526 | AY043457  | chr9  | 130759739 | 130759847 | CDS; BCR-ABL fusion; BCR-ABL fusion protein; Homo sapiens BCR-ABL fusion protein (BCR-ABL fusion) mRNA, partial cds.                                                                                 |
| HSAP0406S00031612 | NM_005716 | chr19 | 14449571  | 14467944  | CDS; RGS19IP1; regulator of G-protein signalling 19 interacting protein 1 isoform 1; Homo sapiens regulator of G-protein signalling 19 interacting protein 1 (RGS19IP1), transcript variant 1, mRNA. |
| HSAP0406S00016170 | NM_024531 | chr8  | 145553032 | 145555754 | CDS; GPR172A; G protein-coupled receptor 172A; Homo sapiens G protein-coupled receptor 172A (GPR172A), mRNA.                                                                                         |
| HSAP0406S00031379 | AJ300588  | chr19 | 10078070  | 10086414  | CDS; N/A; SSF1/P2Y11 chimeric protein; Homo sapiens mRNA for SSF1/P2Y11 chimeric protein.                                                                                                            |
| HSAP0406S00022442 | BC050280  | chr12 | 54364622  | 54387949  | CDS; ITGA7; integrin alpha 7, precursor; Homo sapiens integrin, alpha 7, mRNA (cDNA clone MGC:33821 IMAGE:5284443), complete cds.                                                                    |
| HSAP0406S00008456 | AK056317  | chr4  | 8712457   | 8739550   | CDS; N/A; N/A; Homo sapiens cDNA FLJ31755 fis, clone NT2RI2007498, highly similar to Homo sapiens carboxypeptidase Z precursor, mRNA.                                                                |
| HSAP0406S00010937 | AF110136  | chr5  | 157092579 | 157094306 | CDS; N/A; IHG-1; Homo sapiens IHG-1 mRNA, partial cds.                                                                                                                                               |
| HSAP0406S00006233 | NM_014583 | chr3  | 8518510   | 8584805   | CDS; LMCD1; LIM and cysteine-rich domains 1; Homo sapiens LIM and cysteine-rich domains 1 (LMCD1), mRNA.                                                                                             |
| HSAP0406S00032580 | AL080159  | chr19 | 51078706  | 51080204  | CDS; DKFZp434M154; hypothetical protein; Homo sapiens mRNA; cDNA DKFZp434M154 (from clone DKFZp434M154).                                                                                             |
| HSAP0406S00015428 | BC037295  | chr8  | 43030607  | 43060086  | source; N/A; N/A; Homo sapiens farnesyltransferase, CAAX box, alpha, mRNA (cDNA clone IMAGE:4798668), with apparent retained intron.                                                                 |
| HSAP0406S00031805 | NM_004750 | chr19 | 18565046  | 18578660  | CDS; CRLF1; cytokine receptor-like factor 1; Homo sapiens cytokine receptor-like factor 1 (CRLF1), mRNA.                                                                                             |
| HSAP0406S00031379 | AJ300588  | chr19 | 10078070  | 10086414  | CDS; N/A; SSF1/P2Y11 chimeric protein; Homo sapiens mRNA for SSF1/P2Y11 chimeric protein.                                                                                                            |
| HSAP0406S00033708 | BC011606  | chr20 | 32331736  | 32354811  | CDS; AHCY; S-adenosylhomocysteine hydrolase; Homo sapiens S-adenosylhomocysteine hydrolase, mRNA (cDNA clone MGC:2319 IMAGE:3139231), complete cds.                                                  |
| HSAP0406S00011021 | NM_005990 | chr5  | 171403229 | 171547865 | CDS; STK10; serine/threonine kinase 10; Homo sapiens serine/threonine kinase 10 (STK10), mRNA.                                                                                                       |
| HSAP0406S00034983 | AB028966  | chr22 | 26701809  | 26827711  | CDS; KIAA1043; KIAA1043 protein; Homo sapiens mRNA for KIAA1043 protein, partial cds.                                                                                                                |
| HSAP0406S00006739 | AB007867  | chr3  | 48420266  | 48445876  | CDS; KIAA0407; N/A; Homo sapiens KIAA0407 mRNA, partial cds.                                                                                                                                         |
| HSAP0406S00031371 | NM_058164 | chr19 | 9825394   | 9908070   | CDS; OLFM2; olfactomedin 2; Homo sapiens olfactomedin 2 (OLFM2), mRNA.                                                                                                                               |
| HSAP0406S00006998 | NM_172234 | chr3  | 53855611  | 53874866  | CDS; IL17RB; interleukin 17B receptor isoform 2 precursor; Homo sapiens interleukin 17 receptor B (IL17RB), transcript variant 2, mRNA.                                                              |
| HSAP0406S00005990 | AK091742  | chr2  | 232144964 | 232154700 | CDS; N/A; N/A; Homo sapiens cDNA FLJ34423 fis, clone HHDPC2008123, highly similar to NUCLEOLIN.                                                                                                      |
| HSAP0406S00020586 | NM_006328 | chr11 | 66140672  | 66151387  | CDS; RBM14; RNA binding motif protein 14; Homo sapiens RNA binding motif protein 14 (RBM14), mRNA.                                                                                                   |
| HSAP0406S00027513 | AK127290  | chr16 | 55075800  | 55092332  | CDS; N/A; N/A; Homo sapiens cDNA FLJ45357 fis, clone BRHIP3012997.                                                                                                                                   |
| HSAP0406S00008363 | NM_002111 | chr4  | 3113411   | 3282656   | CDS; HD; huntingtin; Homo sapiens huntingtin (Huntington disease) (HD), mRNA.                                                                                                                        |
| HSAP0406S00034832 | BC028385  | chr22 | 20344882  | 20377104  | CDS; PPIL2; PPIL2 protein; Homo sapiens peptidylprolyl isomerase (cyclophilin)-like 2, mRNA (cDNA clone MGC:33174 IMAGE:4816793), complete cds.                                                      |
| HSAP0406S00035015 | NM_181826 | chr22 | 28324118  | 28419137  | CDS; NF2; neurofibromin 2 isoform 3; Homo sapiens neurofibromin 2 (bilateral acoustic neuroma) (NF2), transcript variant 3, mRNA.                                                                    |

|                    |           |       |           |           |                                                                                                                                                                                    |
|--------------------|-----------|-------|-----------|-----------|------------------------------------------------------------------------------------------------------------------------------------------------------------------------------------|
| HSAP0406S00028179  | AK001488  | chr17 | 609441    | 632284    | CDS; N/A; N/A; Homo sapiens cDNA FLJ10626 fis, clone NT2RP2005549, weakly similar to PUTATIVE LACTOYLGLUTATHIONE LYASE (EC 4.4.1.5).                                               |
| HSAP0406S00035036  | AK055587  | chr22 | 29005661  | 29010076  | CDS; N/A; N/A; Homo sapiens cDNA FLJ31025 fis, clone HLUNG2000501.                                                                                                                 |
| HSAP0406S00019754  | NM_005013 | chr11 | 17254887  | 17309646  | CDS; NUCB2; nucleobindin 2; Homo sapiens nucleobindin 2 (NUCB2), mRNA.                                                                                                             |
| HSAP0406S00031652  | AK027615  | chr19 | 15393905  | 15399041  | CDS; N/A; N/A; Homo sapiens cDNA FLJ14709 fis, clone NT2RP3000605, moderately similar to Mus musculus mRNA for wizL.                                                               |
| HSAP0406S00035013  | AB023200  | chr22 | 28226421  | 28274257  | CDS; KIAA0983; KIAA0983 protein; Homo sapiens mRNA for KIAA0983 protein, partial cds.                                                                                              |
| HSAP0406S00020537  | NM_001323 | chr11 | 65536037  | 65537551  | CDS; CST6; cystatin M precursor; Homo sapiens cystatin E/M (CST6), mRNA.                                                                                                           |
| HSAP0406S00015024  | AK122582  | chr8  | 8212675   | 8276599   | CDS; FLJ00269; FLJ00269 protein; Homo sapiens mRNA for FLJ00269 protein.                                                                                                           |
| HSAP0406S00027659  | NM_014187 | chr16 | 65818514  | 65820682  | CDS; HSPC171; HSPC171 protein; Homo sapiens HSPC171 protein (HSPC171), mRNA.                                                                                                       |
| HSAP0406S00031566  | NM_004907 | chr19 | 13122281  | 13126716  | CDS; IER2; immediate early response 2; Homo sapiens immediate early response 2 (IER2), mRNA.                                                                                       |
| HSAP0406S00011528  | NM_078476 | chr6  | 26566167  | 26577844  | CDS; BTN2A1; butyrophilin, subfamily 2, member A1 isoform 2 precursor; Homo sapiens butyrophilin, subfamily 2, member A1 (BTN2A1), transcript variant 2, mRNA.                     |
| HSAP0406S00030893  | BC005839  | chr19 | 627402    | 634385    | CDS; FSTL3; follistatin-like 3 glycoprotein; Homo sapiens follistatin-like 3 (secreted glycoprotein), mRNA (cDNA clone MGC:2547 IMAGE:2962889), complete cds.                      |
| HSAP0406S00015064  | NM_004462 | chr8  | 11697663  | 11734215  | CDS; FDFT1; farnesyl-diphosphate farnesyltransferase 1; Homo sapiens farnesyl-diphosphate farnesyltransferase 1 (FDFT1), mRNA.                                                     |
| HSAP0406S00012034  | NM_002648 | chr6  | 37245963  | 37251180  | CDS; PIM1; pim-1 oncogene; Homo sapiens pim-1 oncogene (PIM1), mRNA.                                                                                                               |
| HSAP0406S00030074  | AF142569  | chr17 | 73006417  | 73008269  | CDS; SBBI23; hypothetical protein SBBI23; Homo sapiens hypothetical protein SBBI23 (SBBI23) mRNA, complete cds.                                                                    |
| HSAP0406S00034687  | NM_033070 | chr22 | 15992964  | 16014723  | CDS; CECR5; cat eye syndrome chromosome region, candidate 5 isoform 2 precursor; Homo sapiens cat eye syndrome chromosome region, candidate 5 (CECR5), transcript variant 2, mRNA. |
| HSAP0406S00028790  | NM_000638 | chr17 | 23718424  | 23721844  | CDS; VTN; vitronectin precursor; Homo sapiens vitronectin (serum spreading factor, somatomedin B, complement S-protein) (VTN), mRNA.                                               |
| HSAP0406S00032263  | BC015174  | chr19 | 44607188  | 44607994  | CDS; N/A; Unknown (protein for IMAGE:3903143); Homo sapiens, clone IMAGE:3903143, mRNA, partial cds.                                                                               |
| HSAP0406S00025187  | NM_001823 | chr14 | 103055748 | 103058923 | CDS; CKB; brain creatine kinase; Homo sapiens creatine kinase, brain (CKB), mRNA.                                                                                                  |
| HSAP0406S00029492  | NM_024015 | chr17 | 44007874  | 44010742  | CDS; HOXB4; homeo box B4; Homo sapiens homeo box B4 (HOXB4), mRNA.                                                                                                                 |
| HSAP0406S00000568  | M85289    | chr1  | 21894043  | 22009096  | CDS; HSPG2; heparan sulfate proteoglycan; Human heparan sulfate proteoglycan (HSPG2) mRNA, complete cds.                                                                           |
| HSAP0406S00007375  | BC044929  | chr3  | 120843595 | 120862127 | CDS; POPDC2; popeye protein 2; Homo sapiens popeye domain containing 2, mRNA (cDNA clone MGC:49863 IMAGE:5191230), complete cds.                                                   |
| HSAP0406S00009405  | NM_032117 | chr4  | 154623405 | 154693848 | CDS; GAJ; GAJ protein; Homo sapiens GAJ protein (GAJ), mRNA.                                                                                                                       |
| HSAP0406S00031372  | NM_015719 | chr19 | 9931236   | 9982147   | CDS; COL5A3; collagen, type V, alpha 3 preproprotein; Homo sapiens collagen, type V, alpha 3 (COL5A3), mRNA.                                                                       |
| HSAP0406S00000424  | NM_030907 | chr1  | 16303501  | 16308752  | CDS; MGC10731; hypothetical protein MGC10731; Homo sapiens hypothetical protein MGC10731 (MGC10731), mRNA.                                                                         |
| HSAP0406S000005024 | AL512716  | chr2  | 128112232 | 128113215 | CDS; DKFZp547D192; hypothetical protein; Homo sapiens mRNA; cDNA DKFZp547D192 (from clone DKFZp547D192).                                                                           |
| HSAP0406S00016161  | NM_005526 | chr8  | 145486090 | 145509187 | CDS; HSF1; heat shock transcription factor 1; Homo sapiens heat shock transcription factor 1 (HSF1), mRNA.                                                                         |
| HSAP0406S00020410  | BC011528  | chr11 | 63839845  | 63840786  | CDS; N/A; Unknown (protein for IMAGE:3855067); Homo sapiens, clone IMAGE:3855067, mRNA, partial cds.                                                                               |

|                   |           |       |           |           |                                                                                                            |
|-------------------|-----------|-------|-----------|-----------|------------------------------------------------------------------------------------------------------------|
| HSAP0406S00022270 | AK091315  | chr12 | 50490055  | 50492903  | CDS; N/A; N/A; Homo sapiens cDNA FLJ33996 fis, clone DFNES2008881.                                         |
| HSAP0406S00032293 | BC063421  | chr19 | 45430081  | 45483132  | CDS; N/A; Unknown (protein for MGC:70754); Homo sapiens cDNA clone MGC:70754 IMAGE:5220341, complete cds.  |
| HSAP0406S00003536 | NM_145214 | chr1  | 224888113 | 224901252 | CDS; TRIM11; tripartite motif-containing 11; Homo sapiens tripartite motif-containing 11 (TRIM11), mRNA.   |
| HSAP0406S00002945 | NM_002826 | chr1  | 176855624 | 176898826 | CDS; QSCN6; quiescin Q6 isoform a; Homo sapiens quiescin Q6 (QSCN6), transcript variant 1, mRNA.           |
| HSAP0406S00027388 | NM_022744 | chr16 | 31408315  | 31427207  | CDS; FLJ13868; hypothetical protein FLJ13868; Homo sapiens hypothetical protein FLJ13868 (FLJ13868), mRNA. |

**Supp Table 4. MDS patient characteristics for primary MSC sample isolation.**

Bone marrow was obtained at entry of a prospective clinical trial (HOVON89, Eudract nr. 2008-002195-10).

| Sample | Age | WHO     | Hb<br>(mmol/l) | Plt (x10-<br>09/l) | Leu (x10-<br>09/l) | Cytogenetics                          | BM<br>blasts | IPSS |
|--------|-----|---------|----------------|--------------------|--------------------|---------------------------------------|--------------|------|
| MDS_1  | 62  | RCMD-RS | 4              | 587                | 4                  | 46,XY[20]                             | 0%           | 0    |
| MDS_2  | 63  | RAEB-1  | 5.1            | 73                 | 2.8                | 46,XX[20]                             | 5%           | 1    |
| MDS_3  | 65  | RCMD-RS | 5.9            | 249                | 4.24               | 46,XX[20]                             | 3%           | 0.5  |
| MDS_4  | 58  | RCMD-RS | 4.8            | 248                | 4.5                | 45,X,-Y[10]/46,XY[10]                 | 1%           | 0    |
| MDS_5  | 38  | MDS-5q  | 6.3            | 100                | 8.9                | 46,XX,del(5)(q13q33)[2<br>5]/46,XX[5] | 2%           | 0    |
| MDS_6  | 65  | RCMD    | 4.8            | 153                | 5                  | 46,XX[20]                             | 2%           | 0    |
| MDS_7  | 80  | RCMD    | 5.7            | 153                | 10.3               | 46,XY[20]                             | 3%           | 0.5  |
| MDS_8  | 66  | RARS    | 5              | 185                | 12.7               | 46,XX[21]                             | 2%           | 0    |
| MDS_9  | 56  | RARS    | 4.3            | 391                | 3.8                | 46,XX[20]                             | 0%           | 0    |
| MDS_10 | 72  | RCMD-RS | 8.1            | 69                 | 5.5                | 46,XX[20]                             | 1%           | 0.5  |
| MDS_11 | 75  | MDS-5q  | 5.4            | 327                | 8.4                | 46,XX,del(5)(q15q33)[1<br>0]          | 1%           | 0    |
| MDS_12 | 79  | RCMD-RS | 6.2            | 240                | 3.5                | 46,XX[10]                             | 0%           | 0    |

Supp table 5: WNT Targets

| Gene Symbol                            | Chromosomal Location | Gene Title                                                                                         |
|----------------------------------------|----------------------|----------------------------------------------------------------------------------------------------|
| ATOH1                                  | chr4q22              | atonal homolog 1 (Drosophila)                                                                      |
| AXIN2                                  | chr17q23-q24         | axin 2                                                                                             |
| BTRC                                   | chr10q24.32          | beta-transducin repeat containing                                                                  |
| CCND1                                  | chr11q13             | cyclin D1                                                                                          |
| CD44                                   | chr11p13             | CD44 molecule (Indian blood group)                                                                 |
| CD44                                   | chr11p13             | CD44 molecule (Indian blood group)                                                                 |
| CDKN2A                                 | chr9p21              | cyclin-dependent kinase inhibitor 2A (melanoma, p16, inhibits CDK4)                                |
| DPP9                                   |                      | dipeptidyl-peptidase 9                                                                             |
| EGFR                                   | chr7p12              | epidermal growth factor receptor (erythroblastic leukemia viral (v-erb-b) oncogene homolog, avian) |
| ENPP2                                  | chr8q24.1            | ectonucleotide pyrophosphatase/phosphodiesterase 2                                                 |
| FOSL1                                  | chr11q13             | FOS-like antigen 1                                                                                 |
| FZD7                                   | chr2q33              | frizzled homolog 7 (Drosophila)                                                                    |
| FZD7                                   | chr2q33              | frizzled homolog 7 (Drosophila)                                                                    |
| ID2                                    | chr2p25              | inhibitor of DNA binding 2, dominant negative helix-loop-helix protein                             |
| JAG1                                   | chr20p12.1-p11.23    | jagged 1 (Alagille syndrome)                                                                       |
| JUN                                    | chr1p32-p31          | jun oncogene                                                                                       |
| LBH                                    | chr2p23.1            | limb bud and heart development homolog (mouse)                                                     |
| MITF                                   | chr3p14.2-p14.1      | microphthalmia-associated transcription factor                                                     |
| MITF                                   | chr3p14.2-p14.1      | microphthalmia-associated transcription factor                                                     |
| MMP7                                   | chr11q21-q22         | matrix metalloproteinase 7 (matrilysin, uterine)                                                   |
| MSL1                                   | chr17q21.1           | male-specific lethal 1 homolog (Drosophila)                                                        |
| MYCN                                   | chr2p24.1            | v-myc myelocytomatosis viral related oncogene, neuroblastoma derived (avian)                       |
| OVOL2                                  | chr20pter-q11.23     | ovo-like 2 (Drosophila)                                                                            |
| POU5F1 /// POU5F1B<br>/// POU5F1P3 /// |                      |                                                                                                    |
| POU5F1P4                               | chr12p13.31 /// chr  | POU class 5 homeobox 1 /// POU class 5 homeobox 1B /// POU class 5 homeobox 1 pseudogene 3 /// POU |
| PTGS2                                  | chr1q25.2-q25.3      | prostaglandin-endoperoxide synthase 2 (prostaglandin G/H synthase and cyclooxygenase)              |
| RUNX2                                  | chr6p21              | runt-related transcription factor 2                                                                |
| SNAI3                                  | chr16q24.3           | snail homolog 3 (Drosophila)                                                                       |
| TEP1                                   | chr14q11.2           | telomerase-associated protein 1                                                                    |
| TEP1                                   | chr14q11.2           | telomerase-associated protein 1                                                                    |
| BGLAP                                  | chr1q25-q31          | bone gamma-carboxyglutamate (gla) protein                                                          |
| BIRC5                                  | chr17q25             | baculoviral IAP repeat-containing 5                                                                |
| CACNA1G                                | chr17q22             | calcium channel, voltage-dependent, T type, alpha 1G subunit                                       |
| CDH1                                   | chr16q22.1           | cadherin 1, type 1, E-cadherin (epithelial)                                                        |
| CDX1                                   | chr5q31-q33          | caudal type homeobox 1                                                                             |
| CTLA4                                  | chr2q33              | cytotoxic T-lymphocyte-associated protein 4                                                        |
| EDA                                    | chrXq12-q13.1        | ectodysplasin A                                                                                    |
| FST                                    | chr5q11.2            | follistatin                                                                                        |
| GJA1                                   | chr6q21-q23.2        | gap junction protein, alpha 1, 43kDa                                                               |
| IGF1                                   | chr12q22-q23         | insulin-like growth factor 1 (somatomedin C)                                                       |
| LEF1                                   | chr4q23-q25          | lymphoid enhancer-binding factor 1                                                                 |
| MYCBP                                  | chr1p33-p32.2        | c-myc binding protein                                                                              |
| OVOL1                                  | chr11q13             | ovo-like 1(Drosophila)                                                                             |
| PLAUR                                  | chr19q13             | plasminogen activator, urokinase receptor                                                          |
| RET                                    | chr10q11.2           | ret proto-oncogene                                                                                 |
| T                                      | chr6q27              | T, brachyury homolog (mouse)                                                                       |
| TCF3                                   | chr19p13.3           | transcription factor 3 (E2A immunoglobulin enhancer binding factors E12/E47)                       |
| TCF4                                   | chr18q21.1           | transcription factor 4                                                                             |
| TERT                                   | chr5p15.33           | telomerase reverse transcriptase                                                                   |
| VCAN                                   | chr5q14.3            | versican                                                                                           |
